# Supplementary material
Source: publisher site journal article supplement (https://www.spandidos-publications.com/7922/downloadSupplementary)
Supplement: Supplementary file 1 [file downloadSupplementary]

Table SI. Primer sequences used for reverse transcription-quantitative PCR.

| Gene           | Primer sequence (5'-3')      |
|----------------|------------------------------|
| AC026355.2     | F: GCTCTGTTCTTGGTCACCTCTTGG  |
|                | R: GCTGTGTATCGTCCTTGGTCCTTG  |
| AP000695.1     | F: GCATTGGCATCTCCTGTCCTTCC   |
|                | R: CTGGCACACACCTTAGCACTGTC   |
| AP005137.2     | F: AGGATGGGCTCGTGATGGATACTC  |
|                | R: CCTCTTTCATTCCGTGGGCTTCTG  |
| ARHGEF26-AS1   | F: GAACCAACCCAAATGCCCATCAATG |
|                | R: TCCAGCTTTGTCCATGTCCTTGC   |
| $\beta$ -actin | F: GCACCACACCTTCTACAATGAGC   |
|                | R: GGATAGCACAGCCTGGATAGCAAC  |

F, forward; R, reverse.
